# Supplementary material for: Differential activation of G protein‐mediated signaling by synthetic cannabinoid receptor agonists
Source: PubMed Central journal article supplement (PMC7043210; doi:10.1002/prp2.566), 2020-02-26

## Supplementary Figure 1

**Effect of CB1 antagonist on the SCRA induced inhibition of cAMP signalling. A.** Traces from a representative experiment showing that SCRA (JWH-018, 5F-MDMB-PICA, and AB-FUBINACA) induced inhibitory effects were completely blocked by SR141716A (CB1 antagonist, 3  $\mu$ M) pre-treatment. **B.** Scatter dot plot representing SCRA-mediated inhibition of forskolin-induced cAMP response in presence and absence of SR141716A 3  $\mu$ M on HEK 293 cells expressing CB1. Within each set SCRA (100 nM) were compared to SCRA + SR141716. Data were normalized to forskolin (3  $\mu$ M) (100%) and vehicle (0%), and plotted as mean  $\pm$  SEM for at least 5 independent experiments performed in duplicate.

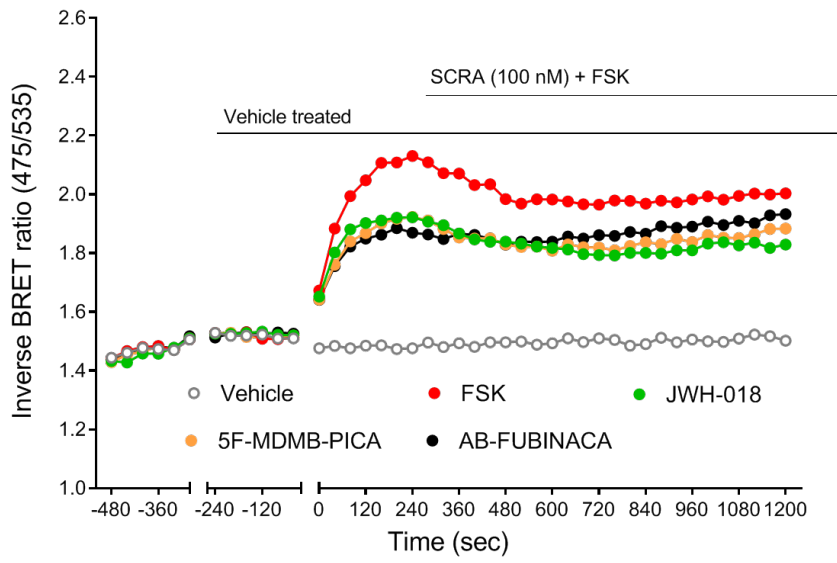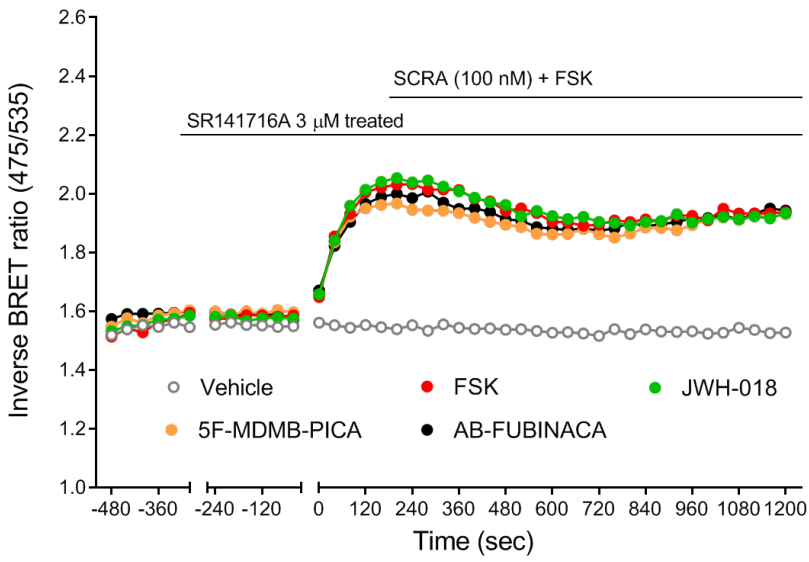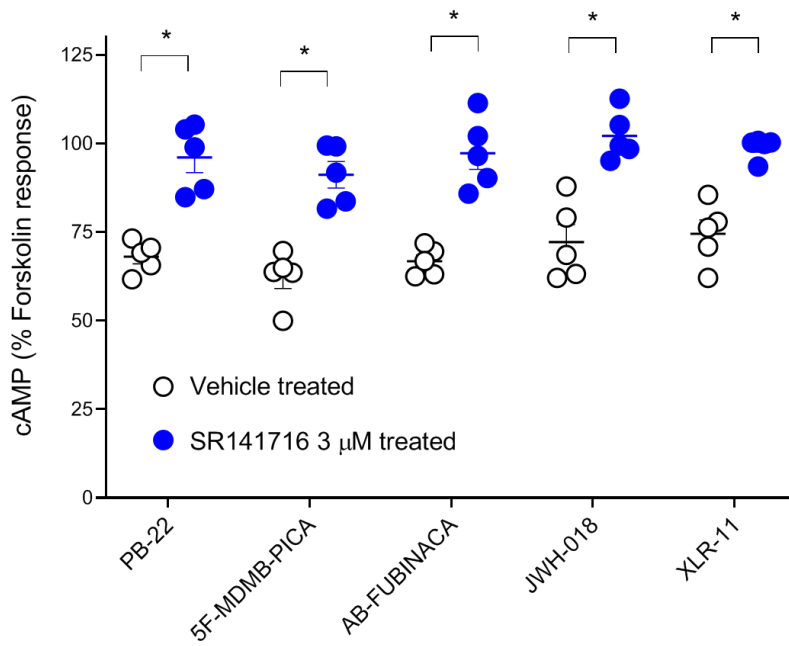

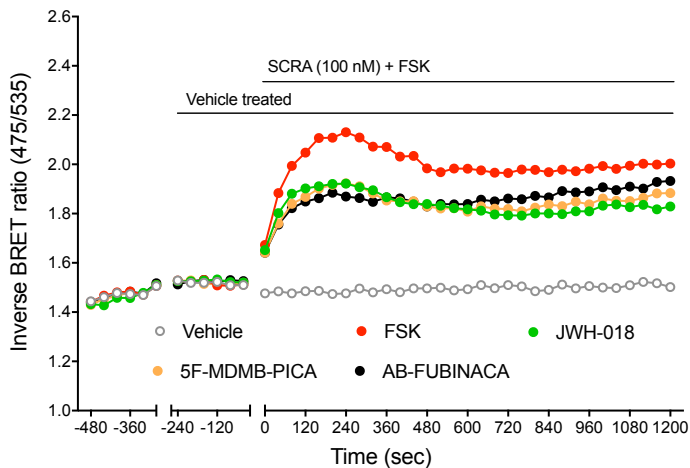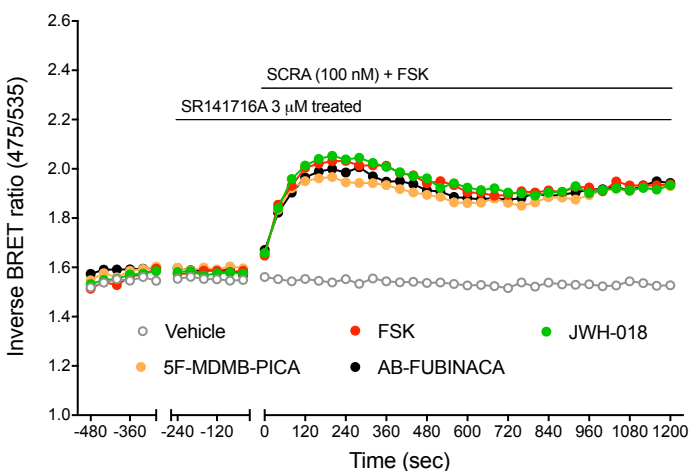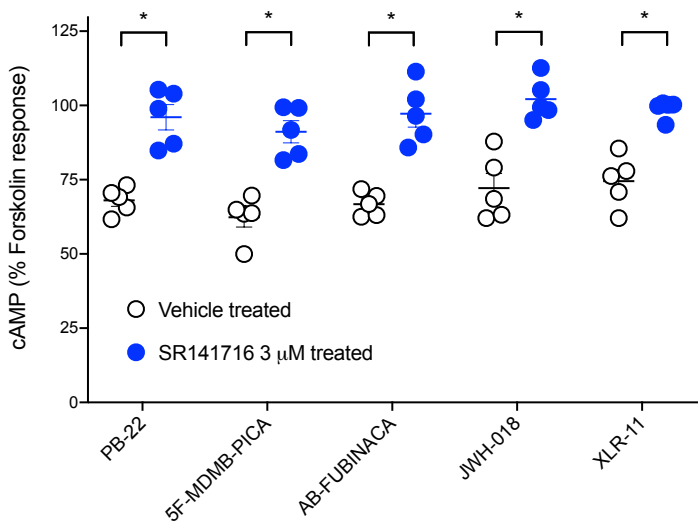

Supplement: PRP2-8-e00566-s001.pdf [file PRP2-8-e00566-s001.pdf]
